# Supplementary material for: Somatic mutation contributing to clonal haematopoiesis is a risk factor of recurrent stroke in first-ever acute ischaemic stroke: a prospective cohort study
Source: HighWire-hosted journal article supplement (doi:10.1136/svn-2022-001756), 2022-09-21
Supplement: svn-2022-001756supp001_data_supplement.pdf [file svn-2022-001756supp001_data_supplement.pdf]

**SUPPLEMENTAL MATERIAL****Table 1:** Association of CHIP with blood traits**Table 2:** Associations between CHIP and recurrent stroke in selected subgroups**Figure 1:** Flow chart of patients' enrolment**Figure 2:** Prevalence of *DNMT3A* and *TET2* according to age.**Figure 3:** The comparison of cumulative incidence of stroke recurrence, combined vascular event, and death within 3 months between CHIP and non-CHIP carriers.**Table 1.** Association of CHIP with blood traits

| Trait | Estimate | Std.Error | P       | gene     |
|-------|----------|-----------|---------|----------|
| BA    | -0.328   | 1.989     | 0.869   | All CHIP |
| EO    | -0.071   | 0.501     | 0.887   | All CHIP |
| HCT   | 0.002    | 0.005     | 0.715   | All CHIP |
| HGB   | 0.001    | 0.005     | 0.860   | All CHIP |
| LY    | -0.178   | 0.108     | 0.101   | All CHIP |
| MCH   | 0.012    | 0.005     | 0.009   | All CHIP |
| MCHC  | 0.007    | 0.003     | 0.033   | All CHIP |
| MCV   | 0.007    | 0.012     | 0.555   | All CHIP |
| MONO  | -0.106   | 0.373     | 0.776   | All CHIP |
| MPV   | -0.006   | 0.048     | 0.894   | All CHIP |
| NEUT  | 0.048    | 0.019     | 0.011   | All CHIP |
| PCT   | 0.005    | 0.033     | 0.871   | All CHIP |
| PDW   | 0.019    | 0.019     | 0.308   | All CHIP |
| PDWCV | 0.019    | 0.010     | 0.071   | All CHIP |
| PLCR  | 0.007    | 0.009     | 0.465   | All CHIP |
| PLT   | 0.004    | 0.001     | <0.0001 | All CHIP |
| RBC   | -0.125   | 0.137     | 0.364   | All CHIP |
| RDW   | 0.019    | 0.017     | 0.262   | All CHIP |
| RDWCV | 0.068    | 0.041     | 0.096   | All CHIP |
| WBC   | 0.033    | 0.029     | 0.267   | All CHIP |
| NLR   | 0.032    | 0.015     | 0.037   | All CHIP |
| BA    | 0.003    | 0.659     | 0.996   | DNMT3A   |
| EO    | 0.472    | 0.715     | 0.509   | DNMT3A   |
| HCT   | -0.001   | 0.008     | 0.925   | DNMT3A   |
| HGB   | -0.001   | 0.009     | 0.942   | DNMT3A   |
| LY    | 0.051    | 0.120     | 0.669   | DNMT3A   |
| MCH   | 0.016    | 0.005     | 0.001   | DNMT3A   |
| MCHC  | 0.002    | 0.009     | 0.850   | DNMT3A   |
| MCV   | 0.037    | 0.022     | 0.095   | DNMT3A   |
| MONO  | -0.075   | 0.660     | 0.909   | DNMT3A   |
| MPV   | -0.196   | 0.077     | 0.010   | DNMT3A   |

|       |         |        |       |        |
|-------|---------|--------|-------|--------|
| NEUT  | 0.051   | 0.024  | 0.030 | DNMT3A |
| PCT   | 0.051   | 0.032  | 0.112 | DNMT3A |
| PDW   | 0.008   | 0.040  | 0.842 | DNMT3A |
| PDWCV | 0.012   | 0.020  | 0.557 | DNMT3A |
| PLCR  | -0.013  | 0.017  | 0.453 | DNMT3A |
| PLT   | 0.004   | 0.002  | 0.018 | DNMT3A |
| RBC   | -0.274  | 0.248  | 0.269 | DNMT3A |
| RDW   | 0.036   | 0.031  | 0.237 | DNMT3A |
| RDWCV | 0.077   | 0.075  | 0.304 | DNMT3A |
| WBC   | -0.005  | 0.055  | 0.934 | DNMT3A |
| NLR   | 0.001   | 0.036  | 0.978 | DNMT3A |
| BA    | -19.129 | 14.078 | 0.174 | TET2   |
| EO    | -9.968  | 3.799  | 0.009 | TET2   |
| HCT   | -0.007  | 0.012  | 0.545 | TET2   |
| HGB   | 0.004   | 0.014  | 0.776 | TET2   |
| LY    | -0.737  | 0.381  | 0.053 | TET2   |
| MCH   | 0.006   | 0.032  | 0.853 | TET2   |
| MCHC  | 0.012   | 0.007  | 0.085 | TET2   |
| MCV   | -0.015  | 0.035  | 0.674 | TET2   |
| MONO  | -1.875  | 1.291  | 0.146 | TET2   |
| MPV   | 0.239   | 0.149  | 0.109 | TET2   |
| NEUT  | 0.079   | 0.027  | 0.004 | TET2   |
| PCT   | -0.129  | 0.369  | 0.727 | TET2   |
| PDW   | 0.016   | 0.053  | 0.766 | TET2   |
| PDWCV | 0.042   | 0.022  | 0.063 | TET2   |
| PLCR  | 0.029   | 0.026  | 0.262 | TET2   |
| PLT   | 0.003   | 0.003  | 0.319 | TET2   |
| RBC   | -0.054  | 0.396  | 0.892 | TET2   |
| RDW   | 0.060   | 0.045  | 0.188 | TET2   |
| RDWCV | -0.012  | 0.083  | 0.889 | TET2   |
| WBC   | -0.020  | 0.091  | 0.825 | TET2   |
| NLR   | 0.047   | 0.021  | 0.025 | TET2   |
| BA    | 0.077   | 0.836  | 0.927 | JAK2   |
| EO    | 1.236   | 0.894  | 0.167 | JAK2   |
| HCT   | -0.008  | 0.017  | 0.651 | JAK2   |
| HGB   | 0.042   | 0.015  | 0.004 | JAK2   |
| LY    | -0.261  | 0.451  | 0.562 | JAK2   |
| MCH   | -0.012  | 0.120  | 0.917 | JAK2   |
| MCHC  | 0.003   | 0.016  | 0.855 | JAK2   |
| MCV   | -0.010  | 0.048  | 0.838 | JAK2   |
| MONO  | 1.294   | 0.557  | 0.020 | JAK2   |
| MPV   | 0.080   | 0.204  | 0.694 | JAK2   |
| NEUT  | 0.085   | 0.033  | 0.009 | JAK2   |

|       |         |        |        |       |
|-------|---------|--------|--------|-------|
| PCT   | -0.005  | 0.148  | 0.972  | JAK2  |
| PDW   | -0.159  | 0.110  | 0.149  | JAK2  |
| PDWCV | -0.102  | 0.149  | 0.494  | JAK2  |
| PLCR  | 0.006   | 0.035  | 0.863  | JAK2  |
| PLT   | 0.015   | 0.002  | <.0001 | JAK2  |
| RBC   | 0.003   | 0.022  | 0.877  | JAK2  |
| RDW   | 0.136   | 0.043  | 0.002  | JAK2  |
| RDWCV | 0.438   | 0.128  | 0.001  | JAK2  |
| WBC   | 0.235   | 0.076  | 0.002  | JAK2  |
| NLR   | 0.051   | 0.029  | 0.076  | JAK2  |
| BA    | -11.612 | 17.640 | 0.510  | GNAS  |
| EO    | -3.253  | 3.575  | 0.363  | GNAS  |
| HCT   | 0.025   | 0.028  | 0.371  | GNAS  |
| HGB   | 0.041   | 0.017  | 0.017  | GNAS  |
| LY    | -0.796  | 0.560  | 0.155  | GNAS  |
| MCH   | -0.158  | 0.110  | 0.153  | GNAS  |
| MCHC  | 0.010   | 0.007  | 0.156  | GNAS  |
| MCV   | -0.095  | 0.037  | 0.009  | GNAS  |
| MONO  | -1.603  | 1.886  | 0.395  | GNAS  |
| MPV   | -0.154  | 0.193  | 0.424  | GNAS  |
| NEUT  | 0.080   | 0.037  | 0.032  | GNAS  |
| PCT   | -5.908  | 6.386  | 0.355  | GNAS  |
| PDW   | 0.097   | 0.033  | 0.004  | GNAS  |
| PDWCV | -0.087  | 0.155  | 0.574  | GNAS  |
| PLCR  | -0.021  | 0.042  | 0.622  | GNAS  |
| PLT   | 0.001   | 0.005  | 0.867  | GNAS  |
| RBC   | 0.003   | 0.021  | 0.896  | GNAS  |
| RDW   | -0.014  | 0.071  | 0.842  | GNAS  |
| RDWCV | 0.209   | 0.207  | 0.311  | GNAS  |
| WBC   | 0.173   | 0.096  | 0.073  | GNAS  |
| NLR   | 0.047   | 0.027  | 0.077  | GNAS  |
| BA    | -0.328  | 1.989  | 0.869  | SF3B1 |
| EO    | -0.071  | 0.501  | 0.887  | SF3B1 |
| HCT   | 0.002   | 0.005  | 0.715  | SF3B1 |
| HGB   | 0.001   | 0.005  | 0.860  | SF3B1 |
| LY    | -0.178  | 0.108  | 0.101  | SF3B1 |
| MCH   | 0.012   | 0.005  | 0.009  | SF3B1 |
| MCHC  | 0.007   | 0.003  | 0.033  | SF3B1 |
| MCV   | 0.007   | 0.012  | 0.555  | SF3B1 |
| MONO  | -0.106  | 0.373  | 0.776  | SF3B1 |
| MPV   | -0.006  | 0.048  | 0.894  | SF3B1 |
| NEUT  | 0.048   | 0.019  | 0.011  | SF3B1 |
| PCT   | 0.005   | 0.033  | 0.871  | SF3B1 |

|       |        |       |         |       |
|-------|--------|-------|---------|-------|
| PDW   | 0.019  | 0.019 | 0.308   | SF3B1 |
| PDWCV | 0.019  | 0.010 | 0.071   | SF3B1 |
| PLCR  | 0.007  | 0.009 | 0.465   | SF3B1 |
| PLT   | 0.004  | 0.001 | <0.0001 | SF3B1 |
| RBC   | -0.125 | 0.137 | 0.364   | SF3B1 |
| RDW   | 0.019  | 0.017 | 0.262   | SF3B1 |
| RDWCV | 0.068  | 0.041 | 0.096   | SF3B1 |
| WBC   | 0.033  | 0.029 | 0.267   | SF3B1 |
| NLR   | 0.032  | 0.015 | 0.037   | SF3B1 |

RDWCV, Red blood cell distribution width CV; BA, Basophilic absolute value; EO, Eosinophilic absolute value; HCT, Hematocrit; HGB, Hemoglobin; LY, Lymphocyte count; MCH, Mean corpuscular hemoglobin; MCHC, Mean hemoglobin concentration; MCV, Mean corpuscular volume; MONO, Monocyte count; MPV, Mean platelet volume; NEUT, Neutrophil absolute value; PCT, Platelet pressure; PDW, Platelet distribution width; PLCR, Large platelet ratio; PLT, Absolute platelet value; RBC, Absolute value of red blood cells; RDW, Red blood cell distribution width; PDWCV, Platelet distribution width; WBC, Absolute white blood cell; PDWCV, Platelet distribution width; NLR, neutrophil to lymphocyte ratio.

**Table 2. Associations between CHIP and recurrent stroke in selected subgroups**

|                            | CHIP  | No CHIP | Unadjusted       |      |                          | Adjusted <sup>a</sup> |       |                          |
|----------------------------|-------|---------|------------------|------|--------------------------|-----------------------|-------|--------------------------|
|                            | (%)   | (%)     | HR (95% CI)      | P    | P <sub>interaction</sub> | HR (95% CI)           | P     | P <sub>interaction</sub> |
| <b>Hyper-inflammation</b>  |       |         |                  |      |                          |                       |       |                          |
| Yes                        | 12.63 | 6.71    | 1.93 (1.07-3.48) | 0.03 | 0.01                     | 3.10 (1.92-5.00)      | <.001 | 0.002                    |
| No                         | 5.50  | 1.60    | 0.29(0.07-1.16)  | 0.08 |                          | 0.18 (0.03-1.04)      | 0.06  |                          |
| <b>ICAS<sub>≥</sub>50%</b> |       |         |                  |      |                          |                       |       |                          |
| Yes                        | 7.34  | 6.93    | 1.05 (0.52-2.14) | 0.89 | 0.95                     | 1.75 (0.98-3.10)      | 0.06  | 0.57                     |
| No                         | 5.41  | 5.01    | 1.09 (0.48-0.84) | 0.84 |                          | 1.34 (0.66-2.74)      | 0.42  |                          |
| <b>ICAO</b>                |       |         |                  |      |                          |                       |       |                          |
| Yes                        | 12.77 | 8.25    | 1.56 (0.69-3.57) | 0.29 | 0.28                     | 2.52 (1.31-4.85)      | 0.006 | 0.08                     |
| No                         | 4.62  | 5.53    | 0.87 (0.43-1.75) | 0.69 |                          | 1.13 (0.61-2.10)      | 0.69  |                          |

<sup>a</sup> Data were adjusted with a stable inverse probability of treatment weighted (IPTW) based on the propensity score (PS). Variables used for calculating PS included age, sex, BMI, smoking, drinking, history of the disease (i.e., hypertension, diabetes mellitus and hyperlipidemia), TOAST classification, admitting NIHSS.

HR, hazards ratio; 95% CI, 95% confidence interval; CHIP, clonal hematopoiesis of indeterminate potential; ICAS, intracranial atherosclerotic stenosis; ICAO, intracranial atherosclerotic occlusion;

1  
2

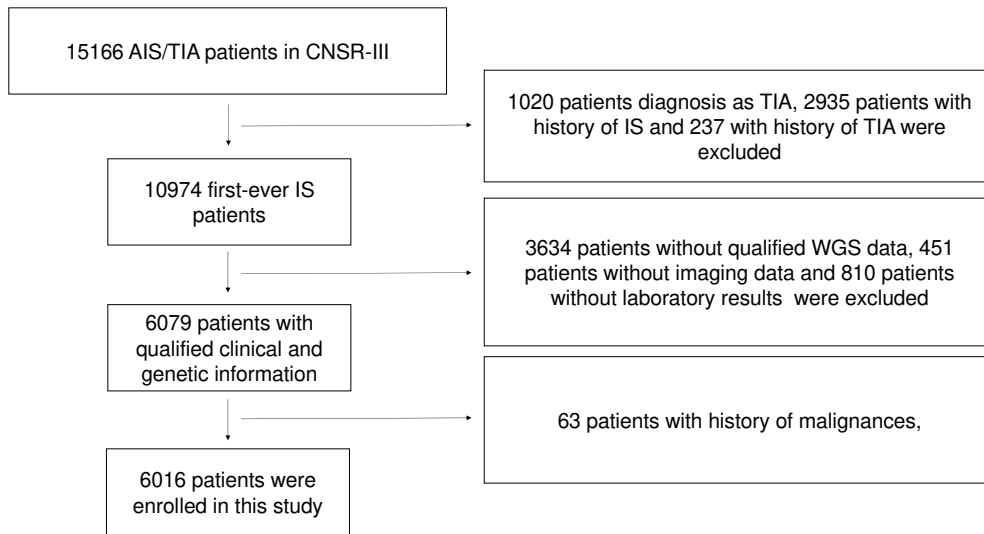

3  
4  
5  
6  
7  
8  
9  
10  
11

**Figure 1:** Flow chart of patients' enrolment

A

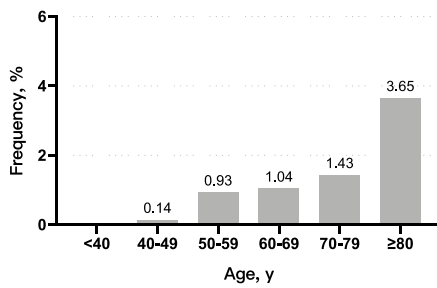

B

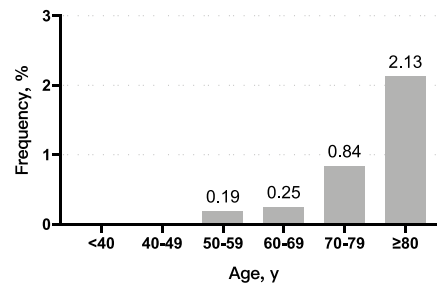

12  
13  
14

**Figure 2:** Prevalence of (A) *DNMT3A* and (B) *TET2* according to age.

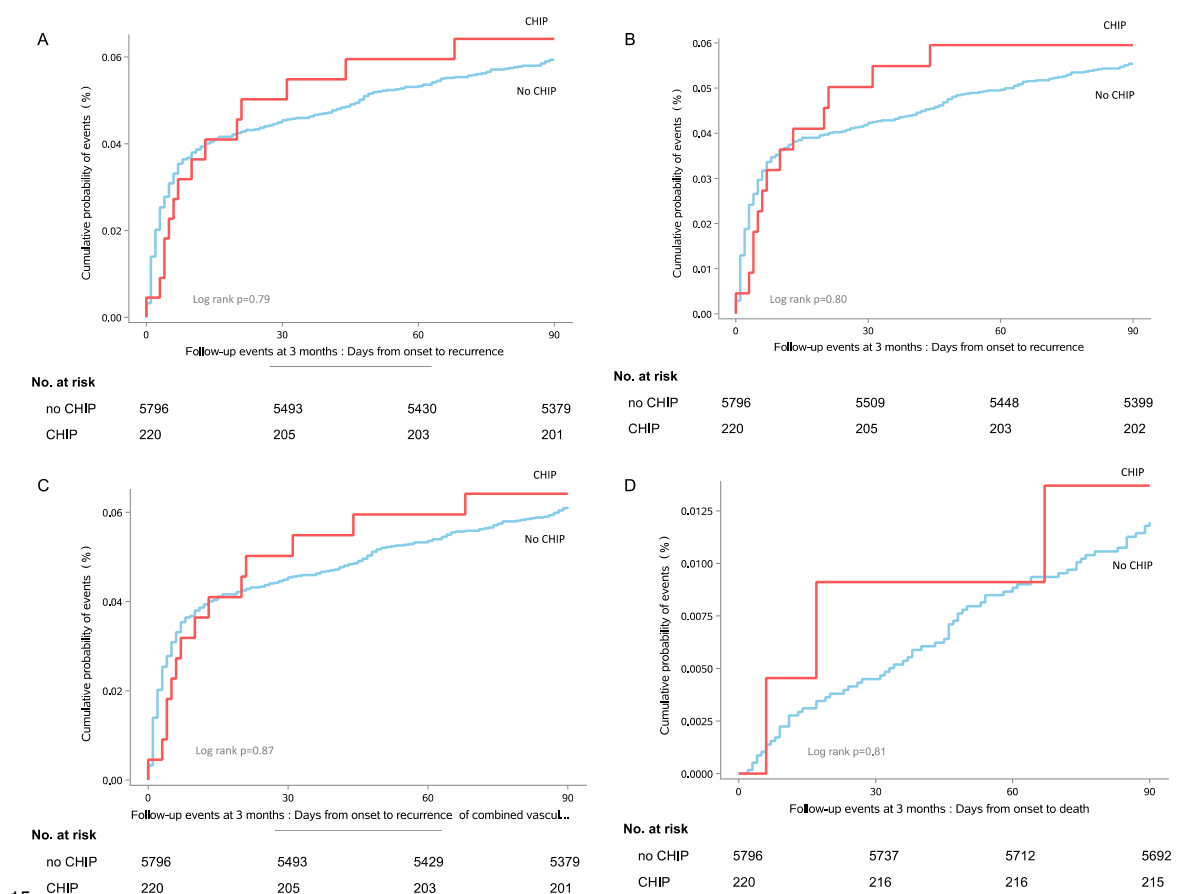

15 **Figure 3:** The comparison of cumulative incidence of (A) recurrent stroke, (B) recurrence of  
 16 ischemic stroke, (C) combined vascular event, and (D) death within 3 months between CHIP  
 17 and non-CHIP carriers.  
 18  
 19
